# Supplementary material for: Investigation into Red Emission and Its Applications: Solvatochromic N-Doped Red Emissive Carbon Dots with Solvent Polarity Sensing and Solid-State Fluorescent Nanocomposite Thin Films
Source: MDPI journal article supplement (doi:10.3390/molecules28041755), 2023-02-12
Supplement: s1 [file s1]

**Investigation into Red Emission and its Applications: Solvatochromic N-Doped Red Emissive Carbon Dots with Solvent Polarity Sensing and Solid-State Fluorescent Nanocomposite Thin Films**

**Justin B. Domena<sup>1</sup>, Ermin Celebic<sup>1</sup>, Braulio C.L.B. Ferreira<sup>1</sup>, Yiqun Zhou<sup>1</sup>, Wei Zhang<sup>1</sup>, Jiuyan Chen<sup>1</sup>, Mattia Bartoli<sup>2</sup>, Alberto Tagliaferro<sup>2</sup>, Qiaxian Johnson<sup>3</sup>, Bhanu P.S. Chauhan<sup>3</sup>, Victor Paulino<sup>1</sup>, Jean-Hubert Olivier<sup>1</sup>, Roger M. Leblanc<sup>1,\*</sup>**

**Author Address**

<sup>1</sup> Department of Chemistry, University of Miami, Coral Gables, FL 33146, USA

<sup>2</sup> Department of Applied Science and Technology, Politecnico di Torino, Italy

<sup>3</sup> Department of Chemistry, William Paterson University of New Jersey, 300 Pompton Rd, Wayne, NJ 07470, USA

\*Correspondence: rml@miami.edu

## Supporting Figures:

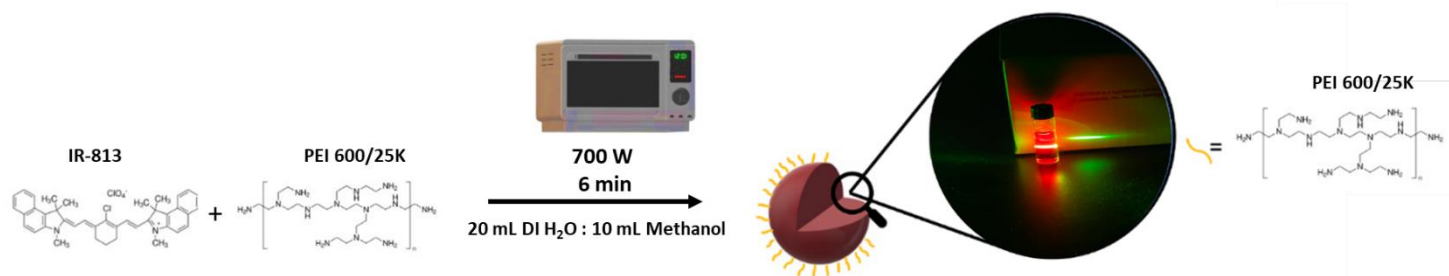

**Figure S1:** Graphic illustration of 813-CD synthetic procedure.

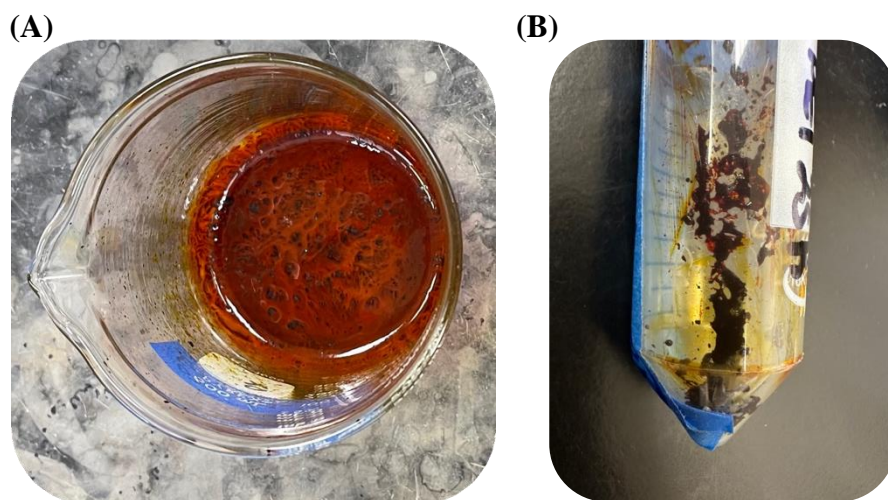

**Figure S2:** Images of 813-CDs post-synthesis and purification. (A) Image of 813-CD 600 PEI. (B) Image of 813-CD 25K PEI.

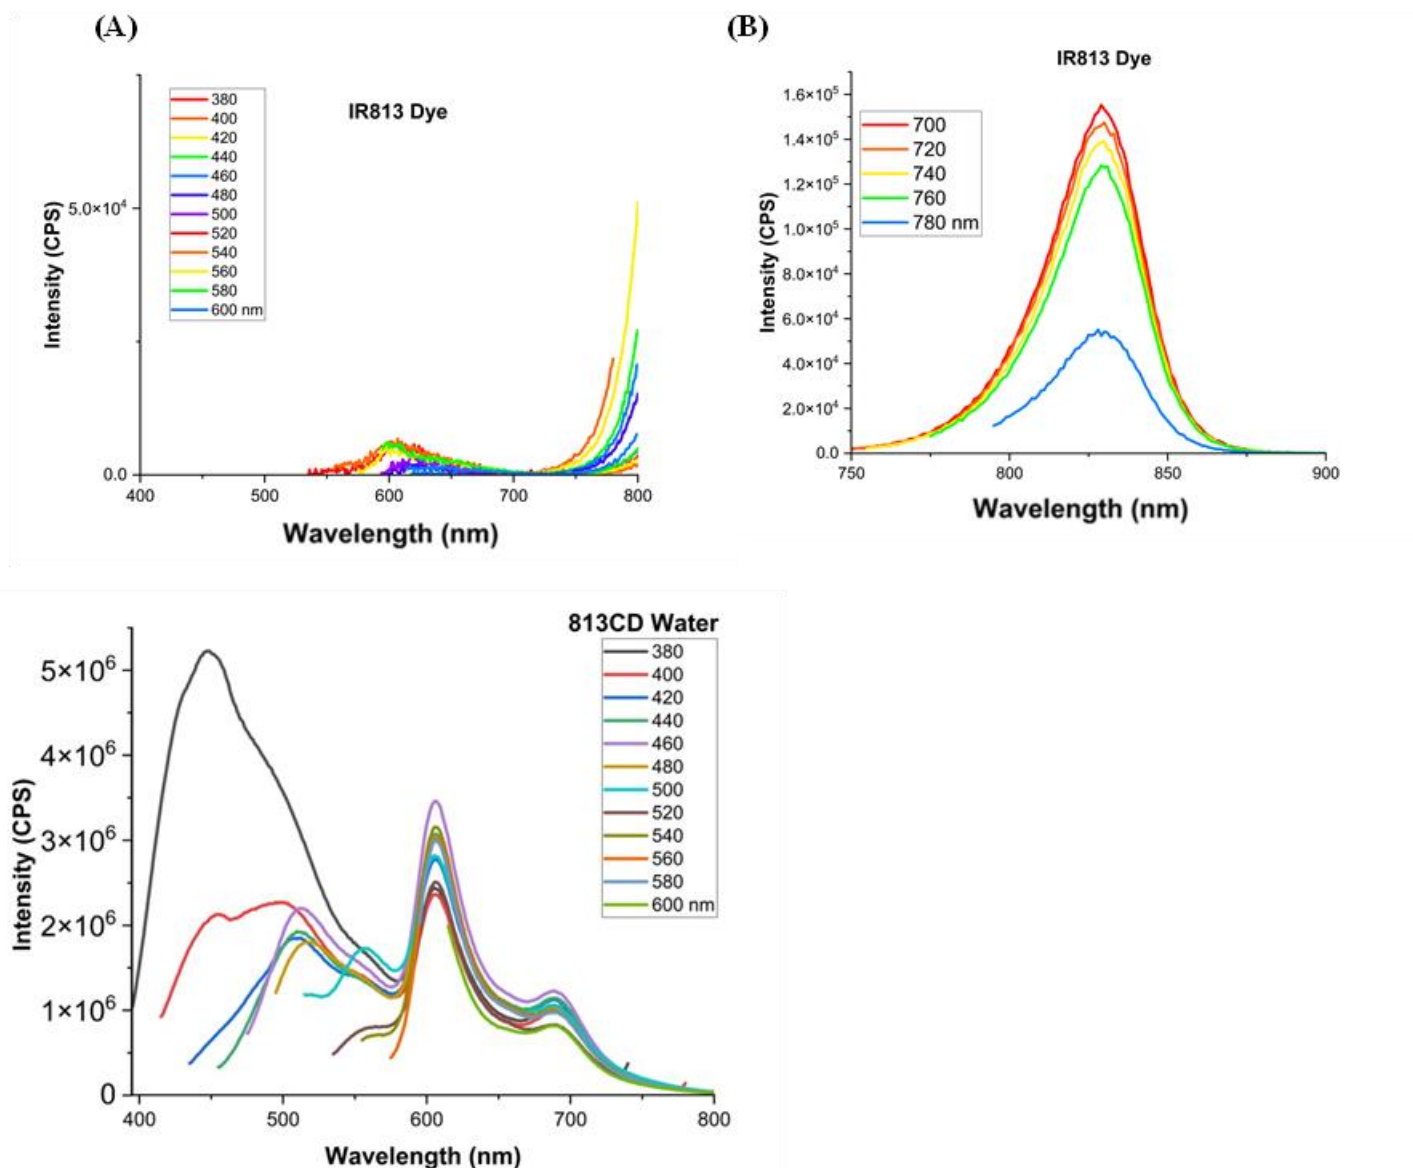

**Figure S3:** PL spectra of 813-CD versus IR-813. (A) PL spectrum of IR-813 from 400-800 nm in methanol. (B) PL spectrum of IR-813 from 750-900 nm in methanol. (C) PL spectrum of 813-CD from 400-800 nm in water.

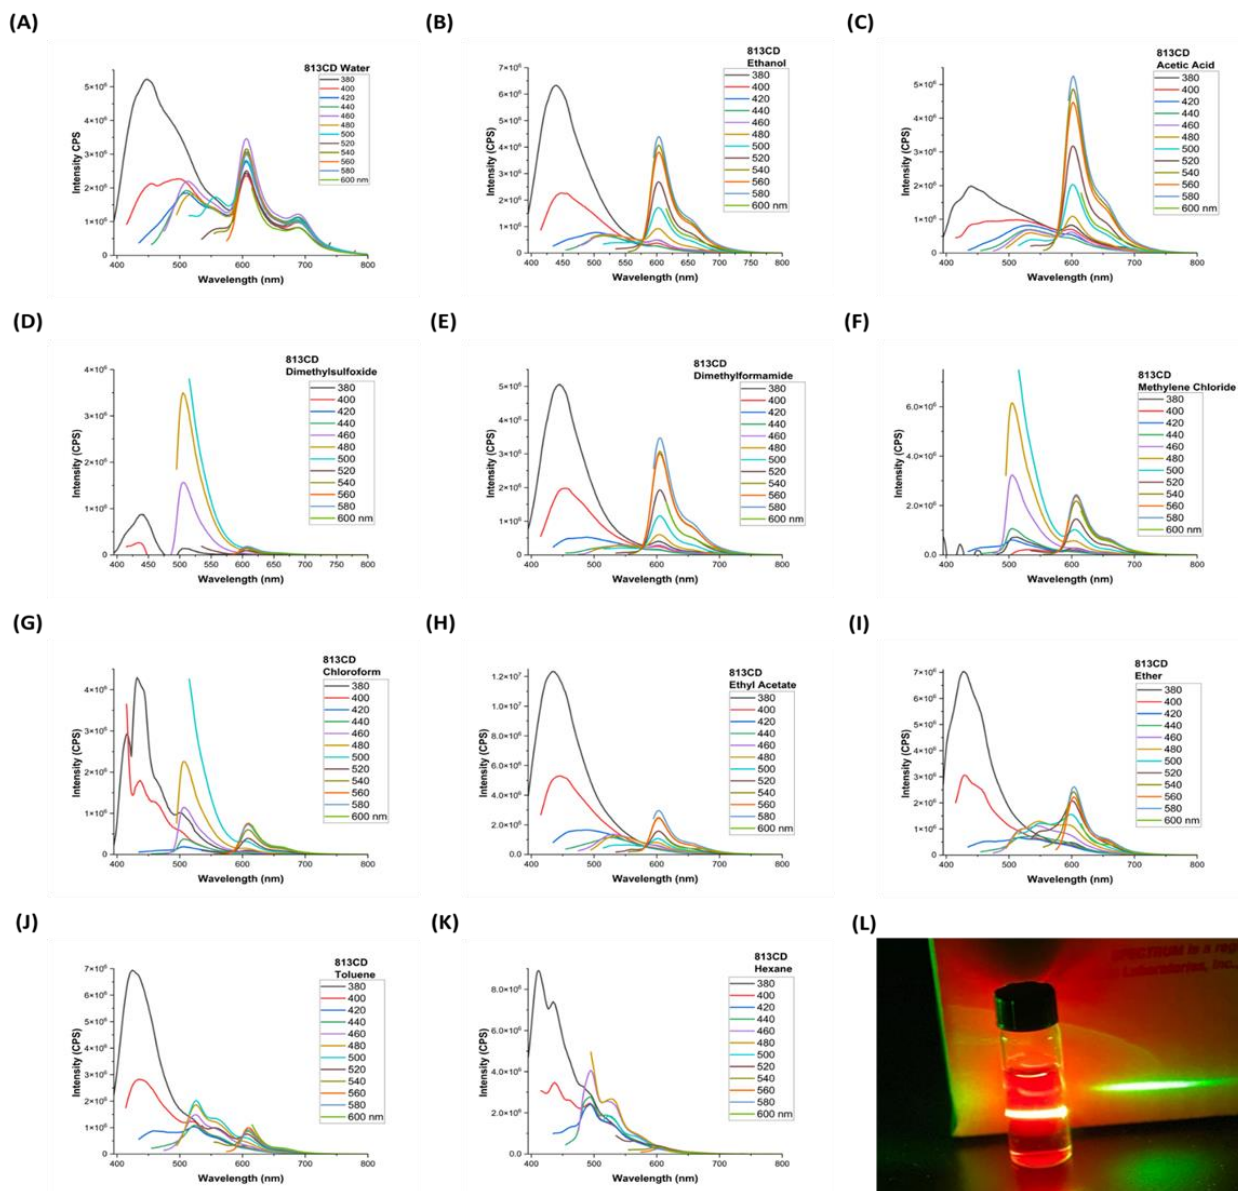

**Figure S4.** Optical analysis of 813-CDs in various solvents of decreasing polarities according to the solvent polarity index ( $P$ ), PL spectrum. (A) water  $P:1.00$ , (B) ethanol  $P:0.654$ , (C) acetic acid  $P:0.648$ , (D) DMSO  $P:0.444$ , (E) DMF  $P:0.386$ , (F) methylene chloride  $P:0.309$ , (G) chloroform  $P:0.259$ , (H) ethyl acetate  $P:0.228$ , (I) ether  $P:0.117$ , (J) toluene  $P:0.099$ , and (K) hexane  $P:0.009$ , respectively.; (L) 813-CDs in water under excitation at 535 nm.

65  
66  
67  
68  
69

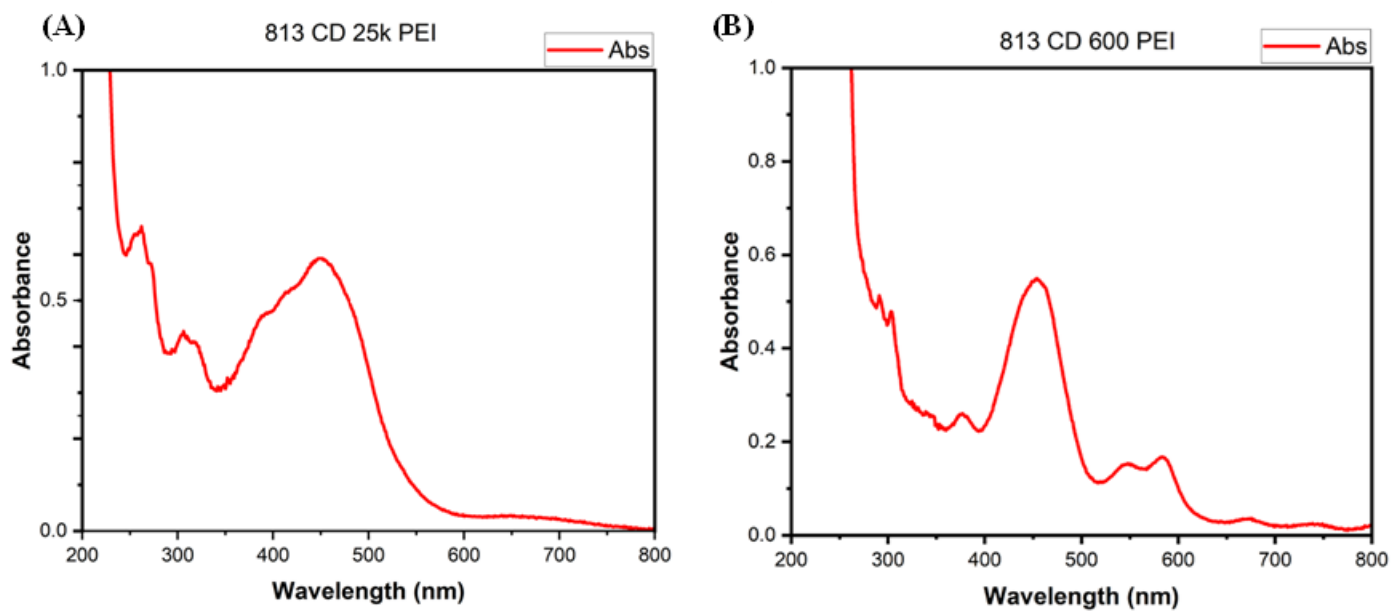

**Figure S5:** UV-vis absorbance spectra of 813-CDs in water. (A) UV-vis spectrum of 813-CD 25K PEI from 200-800 nm. (B) UV-vis spectrum of 813-CD 600 PEI from 200-800 nm.

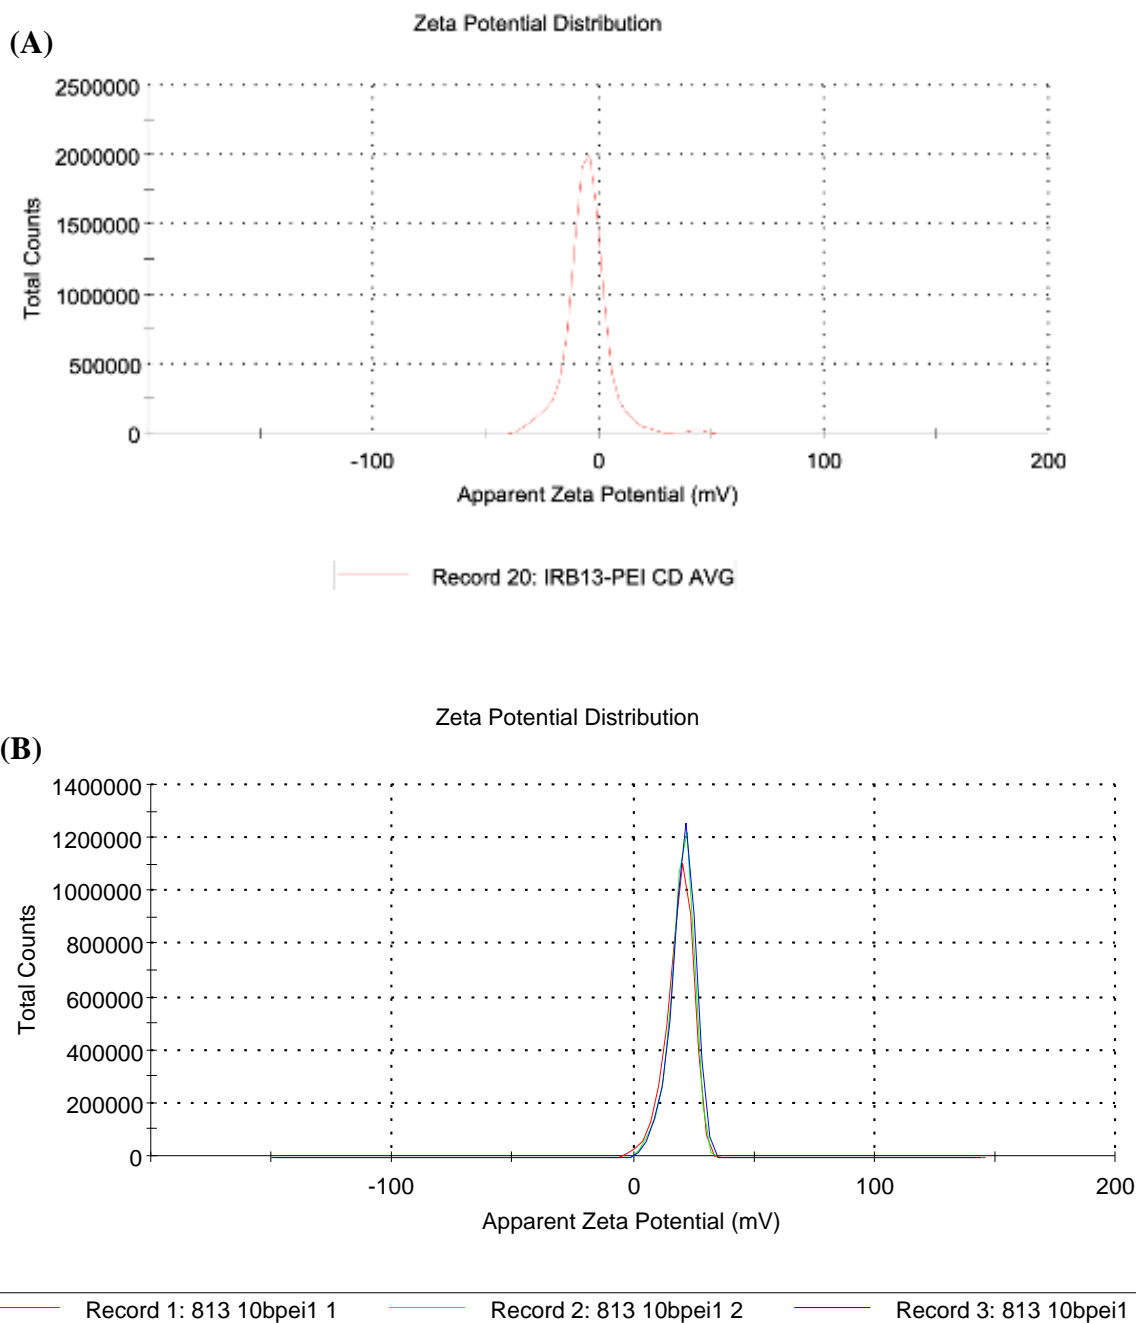

**Figure S6:** Zeta potential of 813-CDs. (A) Zeta potential of 813-CD 600 PEI, -5.11 mV. (B) Zeta potential of 813-CD 25K PEI, +18.8 mV

108  
109

| Summary Chart of 813-CDs |        |           |                   |          |           |                  |                            |
|--------------------------|--------|-----------|-------------------|----------|-----------|------------------|----------------------------|
| CD                       | Dye    | Polymer   | Microwave (Watts) | Time (s) | Size (nm) | Farthest PL (nm) | Application                |
| 813CD-600 PEI            | IR-813 | PEI- 600  | 700               | 360      | 6.0-6.5   | 698              | PVP Film Composite         |
| 813CD-25K PEI            | IR-813 | PEI- 25 K | 700               | 360      | 2.0-3.5   | 776              | Positively Charged Surface |

110 **Table S1.** Summary of CD methodology and properties.
